# Supplementary material for: Organic–inorganic hybrid coordination polymers based on the 5-oxyacetate isophthalic acid (H3OABDC) ligand: syntheses, structures, magnetic and luminescent properties
Source: Royal Society of Chemistry journal article supplement (doi:10.1039/c002090g), 2010-01-01
Supplement: c002090g.pdf [file c002090g.pdf]

## *Supporting Information*

### **Organic-inorganic hybrid coordination polymers based on 5-oxyacetate isophthalic acid (H<sub>3</sub>OABDC) ligand: syntheses, structures, magnetic and luminescent properties**

**Jing Li, Chang-Chun Ji, Zhen-Zhong Lu, Tian-Wei Wang, You Song, Yi-Zhi Li, He-Gen Zheng,\* Zijian Guo,\* Stuart R. Batten**

|                                                                                                      |   |
|------------------------------------------------------------------------------------------------------|---|
| 1. Figure S1-S5. XRD powder patterns of <b>1</b> , <b>2</b> , <b>3</b> , <b>4</b> and <b>5</b> ----- | 1 |
| 2. Figure S6. Three dimensional networks connected by hydrogen bonds of <b>1</b> -----               | 3 |
| 3. Figure S7. Fluorescent emission spectra of ligand -----                                           | 3 |
| 4. Figure S8-S9. An ORTEP drawing of <b>2</b> and <b>3</b> showing 30% ellipsoid probability-----    | 4 |
| 5. Table S1. Selected bond distances (Å) and angles (°) for complexes -----                          | 5 |
| 6. Table S2. Hydrogen bonds in the crystal structures-----                                           | 8 |

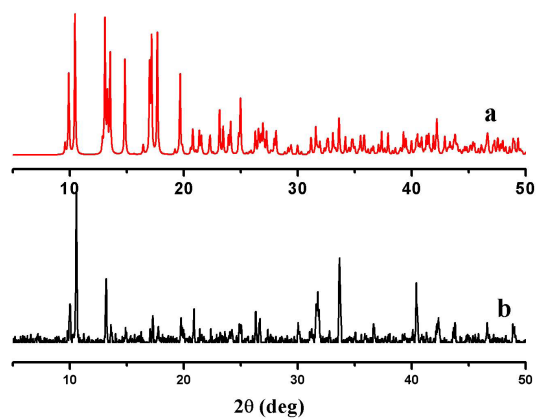

**Fig. S1** PXR D patterns of  $[\text{Sm}(\text{OABDC})(\text{H}_2\text{O})_5]_n \cdot 2n\text{H}_2\text{O}$  (**1**) (a) Simulated from single crystal structure data. (b) Experimental data of **1**.

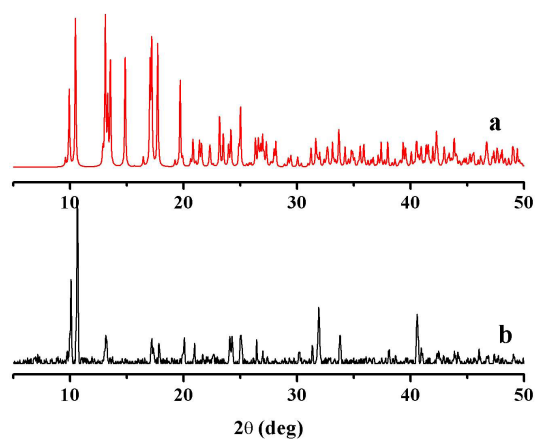

**Fig. S2** PXR D patterns of  $[\text{Eu}(\text{OABDC})(\text{H}_2\text{O})_5]_n \cdot 2n\text{H}_2\text{O}$  (**2**) (a) Simulated from single crystal structure data. (b) Experimental data of **2**.

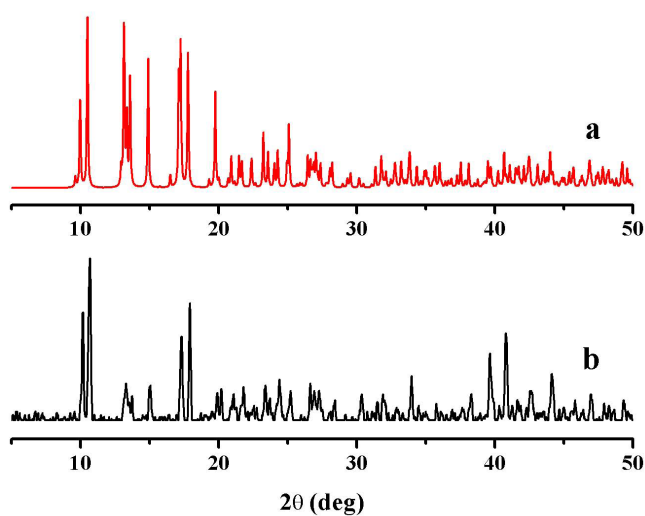

**Fig. S3** PXR D patterns of  $[\text{Dy}(\text{OABDC})(\text{H}_2\text{O})_5]_n \cdot 2n\text{H}_2\text{O}$  (**3**) (a) Simulated from single crystal structure data. (b) Experimental data of **3**.

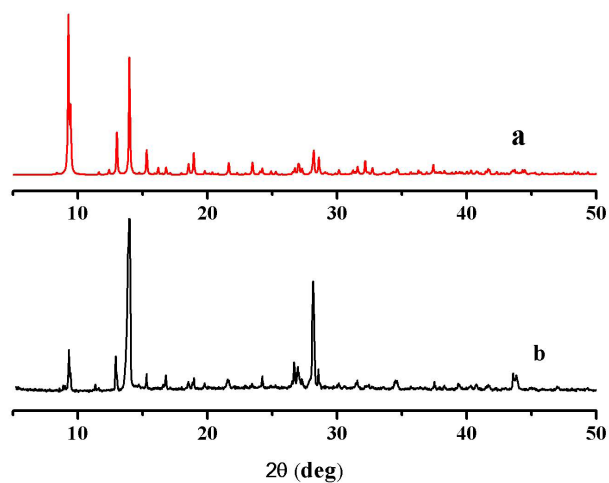

**Fig. S4** PXR D patterns of  $[\text{Ni}_4(\text{OABDC})_2(\text{OH})_2(\text{H}_2\text{O})_4]_n \cdot 4n\text{H}_2\text{O}$  (**4**) (a) Simulated from single crystal structure data. (b) Experimental data of **4**.

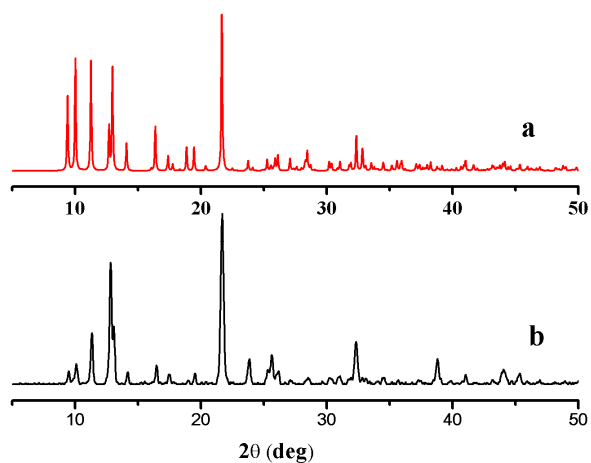

**Fig. S5** PXR D patterns of  $[\text{Cu}_2(\text{OABDC})_{0.5}(4,4'\text{-bpy})(\text{OH})]_n$  (**5**) (a) Simulated from single crystal structure data. (b) Experimental data of **5**.

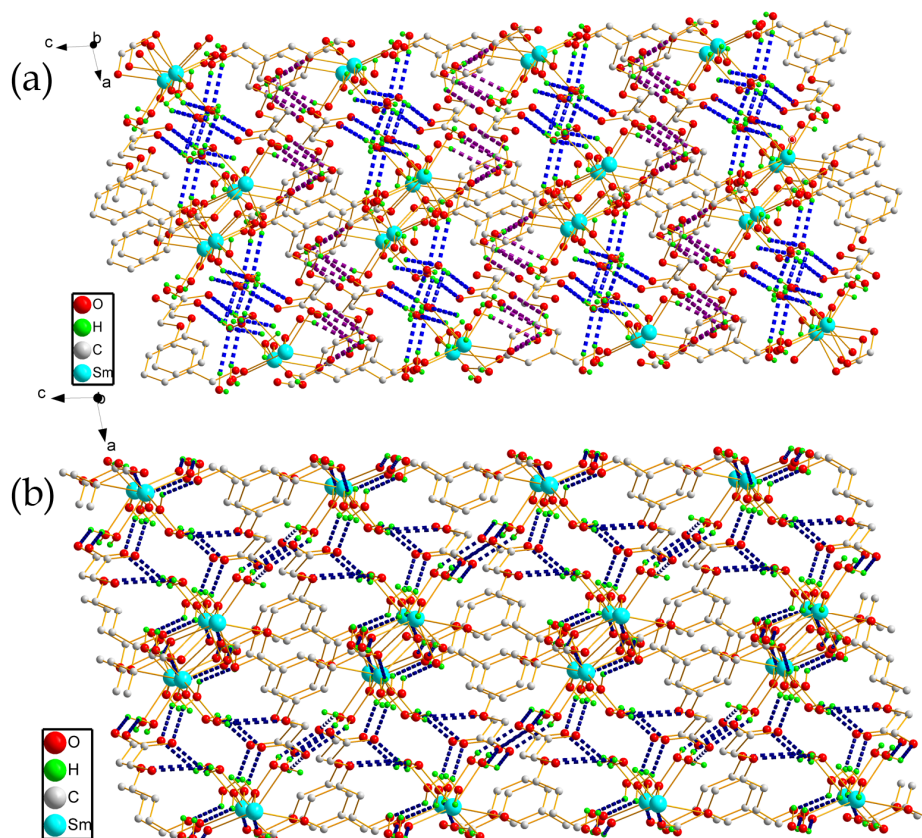

**Fig. S6** In order to facilitate viewing, hydrogen bonds have been divided into two categories. One is obtained by lattice water (a) (purple and blue dotted lines represent hydrogen bonds obtained by different lattice water); the other one is obtained by the remaining water molecules (b) (blue dotted lines).

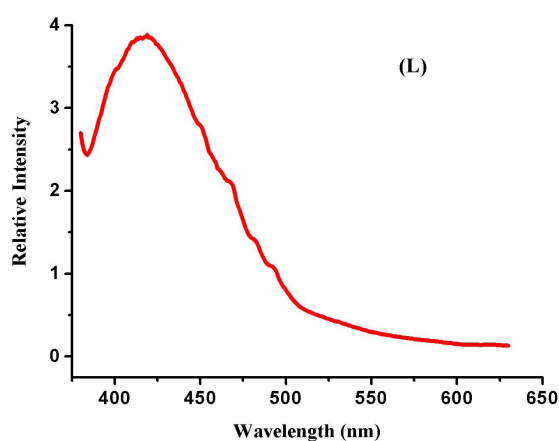

**Fig. S7** Fluorescent emission spectra of ligand ( $\text{H}_3\text{OABDC}$ ) in the solid state at room temperature.

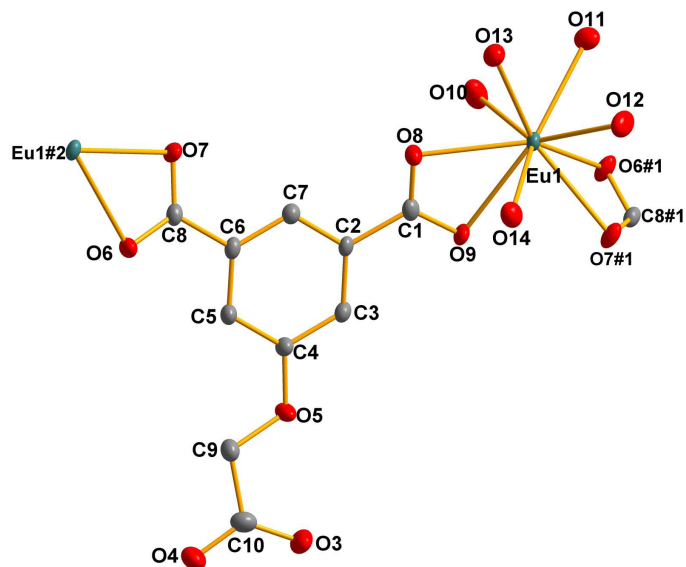

**Fig. S8** An ORTEP drawing of **2** showing 50% ellipsoid probability (hydrogen atoms and lattice water molecules are omitted for clarity). Symmetry codes: #1 =  $x, 1/2-y, -1/2+z$ ; #2 =  $x, 1/2-y, 1/2+z$ .

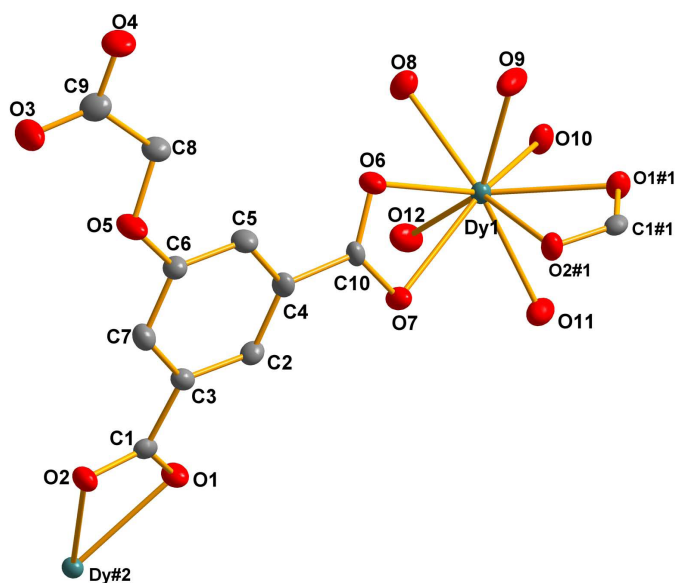

**Fig. S9** An ORTEP drawing of **3** showing 50% ellipsoid probability (hydrogen atoms and lattice water molecules are omitted for clarity). Symmetry codes: #1 =  $x, 3/2-y, 1/2+z$ ; #2 =  $x, 3/2-y, -1/2+z$ .

**Table S1 Selected bond distances (Å) and angles (°)****Complex 1**

|                                      |            |                         |            |
|--------------------------------------|------------|-------------------------|------------|
| Sm1—O1                               | 2.456(4)   | Sm1—O8                  | 2.473(4)   |
| Sm1—O2                               | 2.552(4)   | Sm1—O9                  | 2.432(4)   |
| Sm1 <sup>a</sup> —O3                 | 2.489(4)   | Sm1—O10                 | 2.434(4)   |
| Sm1 <sup>a</sup> —O4                 | 2.496(4)   | O11—Sm1                 | 2.454(4)   |
| Sm1—C1                               | 2.881(6)   | Sm1—O12                 | 2.437(4)   |
| Sm1 <sup>a</sup> —C10                | 2.866(5)   |                         |            |
| <hr/>                                |            |                         |            |
| O11—Sm1—O4 <sup>a</sup>              | 74.11(14)  | O9—Sm1—O2               | 123.91(12) |
| O1—Sm1—O4 <sup>a</sup>               | 128.02(14) | O10—Sm1—O2              | 139.58(14) |
| O8—Sm1—O4 <sup>a</sup>               | 125.26(13) | O12—Sm1—O2              | 74.89(15)  |
| O3 <sup>a</sup> —Sm1—O4 <sup>a</sup> | 52.04(13)  | O11—Sm1—O2              | 142.90(14) |
| O9—Sm1—O10                           | 75.18(14)  | O1—Sm1—O2               | 51.60(12)  |
| O9—Sm1—O12                           | 91.49(16)  | O8—Sm1—O2               | 74.16(14)  |
| O10—Sm1—O12                          | 144.63(15) | O3 <sup>a</sup> —Sm1—O2 | 76.31(13)  |
| O9—Sm1—O11                           | 71.96(14)  | O4 <sup>a</sup> —Sm1—O2 | 83.87(14)  |
| O10—Sm1—O11                          | 73.57(15)  | O9—Sm1—O8               | 84.39(14)  |
| O12—Sm1—O11                          | 71.15(14)  | O10—Sm1—O8              | 72.94(14)  |
| O9—Sm1—O1                            | 72.67(13)  | O12—Sm1—O8              | 139.26(13) |
| O10—Sm1—O1                           | 134.14(15) | O11—Sm1—O8              | 142.88(15) |
| O12—Sm1—O1                           | 67.97(14)  | O1—Sm1—O8               | 72.16(14)  |
| O11—Sm1—O1                           | 124.07(13) | O9—Sm1—O3 <sup>a</sup>  | 145.20(14) |
| O10—Sm1—O3 <sup>a</sup>              | 72.57(14)  | O8—Sm1—O3 <sup>a</sup>  | 74.02(13)  |
| O12—Sm1—O3 <sup>a</sup>              | 122.65(15) | O10—Sm1—O4 <sup>a</sup> | 96.47(14)  |
| O11—Sm1—O3 <sup>a</sup>              | 110.27(13) | O12—Sm1—O4 <sup>a</sup> | 76.36(14)  |
| O1—Sm1—O3 <sup>a</sup>               | 123.46(14) | O9—Sm1—O4 <sup>a</sup>  | 146.04(14) |

**Complex 2**

|                      |            |                                      |            |
|----------------------|------------|--------------------------------------|------------|
| Eu1 <sup>a</sup> —O6 | 2.478(4)   | Eu1—O11                              | 2.433(4)   |
| Eu1 <sup>a</sup> —O7 | 2.478(3)   | Eu1—O12                              | 2.427(4)   |
| Eu1—O8               | 2.451(3)   | Eu1—O13                              | 2.425(4)   |
| Eu1—O9               | 2.545(3)   | Eu1—O14                              | 2.451(4)   |
| Eu1—O10              | 2.433(4)   | Eu1 <sup>a</sup> —C8                 | 2.857(5)   |
| <hr/>                |            |                                      |            |
| O13—Eu1—O12          | 74.87(14)  | O13—Eu1—O6 <sup>a</sup>              | 145.82(13) |
| O13—Eu1—O11          | 71.81(13)  | O12—Eu1—O6 <sup>a</sup>              | 96.18(14)  |
| O12—Eu1—O11          | 73.46(14)  | O11—Eu1—O6 <sup>a</sup>              | 74.02(13)  |
| O13—Eu1—O10          | 92.10(14)  | O10—Eu1—O6 <sup>a</sup>              | 75.88(13)  |
| O12—Eu1—O10          | 144.14(14) | O14—Eu1—O6 <sup>a</sup>              | 125.24(12) |
| O11—Eu1—O10          | 70.73(14)  | O8—Eu1—O6 <sup>a</sup>               | 128.32(12) |
| O13—Eu1—O14          | 84.51(13)  | O7 <sup>a</sup> —Eu1—O6 <sup>a</sup> | 52.14(11)  |
| O12—Eu1—O14          | 73.57(12)  | O13—Eu1—O9                           | 124.24(11) |
| O11—Eu1—O14          | 143.34(14) | O12—Eu1—O9                           | 139.78(12) |

|                         |            |                         |            |
|-------------------------|------------|-------------------------|------------|
| O10—Eu1—O14             | 139.41(12) | O11—Eu1—O9              | 142.77(13) |
| O13—Eu1—O8              | 72.88(12)  | O10—Eu1—O9              | 75.03(13)  |
| O12—Eu1—O8              | 134.16(14) | O14—Eu1—O9              | 73.83(12)  |
| O11—Eu1—O8              | 124.01(13) | O8—Eu1—O9               | 51.71(11)  |
| O10—Eu1—O8              | 68.67(13)  | O7 <sup>a</sup> —Eu1—O9 | 76.04(11)  |
| O14—Eu1—O8              | 71.73(12)  | O6 <sup>a</sup> —Eu1—O9 | 83.98(12)  |
| O13—Eu1—O7 <sup>a</sup> | 145.02(12) | O10—Eu1—O7 <sup>a</sup> | 122.18(14) |
| O12—Eu1—O7 <sup>a</sup> | 72.80(13)  | O14—Eu1—O7 <sup>a</sup> | 73.89(12)  |
| O11—Eu1—O7 <sup>a</sup> | 110.62(12) | O8—Eu1—O7 <sup>a</sup>  | 123.19(12) |

### Complex3

|                      |          |         |          |
|----------------------|----------|---------|----------|
| Dy1 <sup>b</sup> —O1 | 2.427(3) | Dy1—O9  | 2.390(3) |
| Dy1 <sup>b</sup> —O2 | 2.512(3) | Dy1—O10 | 2.382(3) |
| Dy1—O6               | 2.452(3) | Dy1—O11 | 2.423(3) |
| Dy1—O7               | 2.448(3) | Dy1—O12 | 2.401(3) |
| Dy1—O8               | 2.399(3) |         |          |

|                         |            |                                      |            |
|-------------------------|------------|--------------------------------------|------------|
| O10—Dy1—O9              | 92.45(12)  | O10—Dy1—O6                           | 146.01(11) |
| O10—Dy1—O8              | 72.36(11)  | O9—Dy1—O6                            | 76.05(12)  |
| O9—Dy1—O8               | 71.14(12)  | O8—Dy1—O6                            | 73.66(11)  |
| O10—Dy1—O12             | 74.48(12)  | O12—Dy1—O6                           | 96.35(12)  |
| O9—Dy1—O12              | 144.50(12) | O11—Dy1—O6                           | 125.87(10) |
| O8—Dy1—O12              | 73.45(12)  | O1 <sup>b</sup> —Dy1—O6              | 128.73(10) |
| O10—Dy1—O11             | 83.46(11)  | O7—Dy1—O6                            | 52.86(10)  |
| O9—Dy1—O11              | 139.30(12) | O10—Dy1—O2 <sup>b</sup>              | 124.51(10) |
| O8—Dy1—O11              | 142.75(11) | O9—Dy1—O2 <sup>b</sup>               | 75.13(12)  |
| O12—Dy1—O11             | 73.02(11)  | O8—Dy1—O2 <sup>b</sup>               | 142.96(11) |
| O10—Dy1—O1 <sup>b</sup> | 72.49(10)  | O12—Dy1—O2 <sup>b</sup>              | 139.37(11) |
| O9—Dy1—O1 <sup>b</sup>  | 68.45(12)  | O11—Dy1—O2 <sup>b</sup>              | 74.24(10)  |
| O8—Dy1—O1 <sup>b</sup>  | 124.08(11) | O1 <sup>b</sup> —Dy1—O2 <sup>b</sup> | 52.46(9)   |
| O12—Dy1—O1 <sup>b</sup> | 133.66(12) | O7—Dy1—O2 <sup>b</sup>               | 75.56(10)  |
| O11—Dy1—O1 <sup>b</sup> | 71.75(11)  | O6—Dy1—O2 <sup>b</sup>               | 83.87(10)  |
| O10—Dy1—O7              | 144.21(11) | O12—Dy1—O7                           | 72.68(11)  |
| O9—Dy1—O7               | 122.80(11) | O11—Dy1—O7                           | 73.72(10)  |
| O8—Dy1—O7               | 110.75(11) | O1 <sup>b</sup> —Dy1—O7              | 123.21(10) |

### Complex 4

|                       |          |                       |          |
|-----------------------|----------|-----------------------|----------|
| Ni1—O9                | 2.015(3) | Ni2—O17               | 2.025(3) |
| Ni1—O20               | 2.045(3) | Ni2 <sup>d</sup> —O10 | 2.035(3) |
| Ni1—O17               | 2.070(3) | Ni2 <sup>d</sup> —O4  | 2.052(3) |
| Ni1—O15               | 2.088(3) | Ni2—O20               | 2.068(3) |
| Ni1 <sup>e</sup> —O6  | 2.094(3) | Ni2—O16               | 2.109(3) |
| Ni1 <sup>c</sup> —O14 | 2.114(3) | Ni2—O3                | 2.135(3) |
| Ni3—O17               | 2.012(3) | Ni4—O8                | 1.991(3) |

|                       |          |                       |          |
|-----------------------|----------|-----------------------|----------|
| Ni3—O19               | 2.027(3) | Ni4 <sup>d</sup> —O11 | 2.005(3) |
| Ni3 <sup>c</sup> —O7  | 2.029(3) | Ni4—O20               | 2.023(3) |
| Ni3 <sup>d</sup> —O5  | 2.031(3) | Ni4—O3                | 2.044(3) |
| Ni3 <sup>c</sup> —O14 | 2.042(3) | Ni4—O18               | 2.086(3) |
| Ni3 <sup>c</sup> —O12 | 2.179(3) | Ni4—O1                | 2.210(3) |

|                                       |            |                                       |            |
|---------------------------------------|------------|---------------------------------------|------------|
| O9—Ni1—O20                            | 95.81(13)  | O17—Ni2—O10 <sup>d</sup>              | 178.27(13) |
| O9—Ni1—O17                            | 96.50(13)  | O17—Ni2—O4 <sup>d</sup>               | 98.61(12)  |
| O20—Ni1—O17                           | 83.13(12)  | O10 <sup>d</sup> —Ni2—O4 <sup>d</sup> | 81.30(13)  |
| O9—Ni1—O15                            | 97.08(15)  | O17—Ni2—O20                           | 83.64(12)  |
| O20—Ni1—O15                           | 92.12(13)  | O10 <sup>d</sup> —Ni2—O20             | 98.09(12)  |
| O17—Ni1—O15                           | 166.00(13) | O4 <sup>d</sup> —Ni2—O20              | 95.46(12)  |
| O9—Ni1—O6 <sup>e</sup>                | 80.86(13)  | O17—Ni2—O16                           | 91.72(13)  |
| O20—Ni1—O6 <sup>e</sup>               | 176.63(13) | O10 <sup>d</sup> —Ni2—O16             | 86.56(13)  |
| O17—Ni1—O6 <sup>e</sup>               | 97.74(12)  | O4 <sup>d</sup> —Ni2—O16              | 91.66(13)  |
| O15—Ni1—O6 <sup>e</sup>               | 87.77(13)  | O20—Ni2—O16                           | 172.01(13) |
| O9—Ni1—O14 <sup>c</sup>               | 165.23(13) | O17—Ni2—O3                            | 92.51(12)  |
| O20—Ni1—O14 <sup>c</sup>              | 96.84(12)  | O10 <sup>d</sup> —Ni2—O3              | 87.82(13)  |
| O17—Ni1—O14 <sup>c</sup>              | 77.53(12)  | O4 <sup>d</sup> —Ni2—O3               | 166.38(12) |
| O15—Ni1—O14 <sup>c</sup>              | 90.04(13)  | O20—Ni2—O3                            | 77.91(12)  |
| O6 <sup>e</sup> —Ni1—O14 <sup>c</sup> | 86.53(13)  | O16—Ni2—O3                            | 95.86(13)  |
| O17—Ni3—O19                           | 101.48(15) | O8—Ni4—O11 <sup>d</sup>               | 163.33(13) |
| O17—Ni3—O7 <sup>e</sup>               | 93.72(13)  | O8—Ni4—O20                            | 97.81(13)  |
| O19—Ni3—O7 <sup>e</sup>               | 82.83(13)  | O11 <sup>d</sup> —Ni4—O20             | 94.23(13)  |
| O17—Ni3—O5 <sup>d</sup>               | 99.11(13)  | O8—Ni4—O3                             | 99.38(13)  |
| O19—Ni3—O5 <sup>d</sup>               | 85.86(13)  | O11 <sup>d</sup> —Ni4—O3              | 93.83(13)  |
| O7 <sup>e</sup> —Ni3—O5 <sup>d</sup>  | 164.35(13) | O20—Ni4—O3                            | 81.08(12)  |
| O17—Ni3—O14 <sup>c</sup>              | 80.53(12)  | O8—Ni4—O18                            | 81.89(14)  |
| O19—Ni3—O14 <sup>c</sup>              | 177.29(15) | O11 <sup>d</sup> —Ni4—O18             | 83.31(13)  |
| O7—Ni3—O14 <sup>c</sup>               | 95.26(13)  | O20—Ni4—O18                           | 109.04(13) |
| O5—Ni3—O14 <sup>c</sup>               | 95.65(13)  | O3—Ni4—O18                            | 169.61(14) |
| O17—Ni3—O12 <sup>c</sup>              | 156.80(12) | O8—Ni4—O1                             | 86.68(13)  |
| O19—Ni3—O12 <sup>c</sup>              | 101.66(14) | O11 <sup>d</sup> —Ni4—O1              | 86.61(13)  |
| O7—Ni3—O12 <sup>c</sup>               | 87.61(13)  | O20—Ni4—O1                            | 157.39(12) |
| O5—Ni3—O12 <sup>c</sup>               | 84.12(12)  | O3—Ni4—O1                             | 76.32(12)  |
| O14—Ni3—O12 <sup>c</sup>              | 76.29(12)  | O18—Ni4—O1                            | 93.51(13)  |

### Complex 5

|                       |            |                      |          |
|-----------------------|------------|----------------------|----------|
| Cu1—O6                | 1.929(6)   | Cu2 <sup>i</sup> —O2 | 1.936(5) |
| Cu1 <sup>f</sup> —O1  | 1.949(5)   | Cu2—O5               | 1.959(5) |
| Cu1 <sup>g</sup> —O7  | 1.973(5)   | Cu2—O7               | 1.969(5) |
| Cu1—O7                | 2.001(5)   | Cu2—N1               | 2.023(6) |
| Cu1 <sup>h</sup> —O3  | 2.152(5)   | Cu2 <sup>h</sup> —O4 | 2.152(5) |
| Cu1 <sup>g</sup> —Cu1 | 3.0213(17) |                      |          |



|                                       |            |                                      |          |
|---------------------------------------|------------|--------------------------------------|----------|
| O6—Cu1—O1 <sup>f</sup>                | 84.2(2)    | O2 <sup>i</sup> —Cu2—O5              | 161.8(3) |
| O6—Cu1—O7                             | 95.2(2)    | O2 <sup>i</sup> —Cu2—O7              | 92.9(2)  |
| O1 <sup>f</sup> —Cu1—O7               | 161.8(2)   | O5—Cu2—O7                            | 93.7(2)  |
| O7 <sup>g</sup> —Cu1—O7               | 81.0(2)    | O2 <sup>i</sup> —Cu2—N1              | 85.7(2)  |
| O6—Cu1—O3 <sup>h</sup>                | 94.4(2)    | O5—Cu2—N1                            | 83.3(2)  |
| O1 <sup>f</sup> —Cu1—O3 <sup>h</sup>  | 98.2(2)    | O7—Cu2—N1                            | 164.2(2) |
| O7—Cu1—O3 <sup>h</sup>                | 99.9(2)    | O2 <sup>i</sup> —Cu2—O4 <sup>h</sup> | 99.9(2)  |
| O6—Cu1—Cu1 <sup>g</sup>               | 135.23(18) | O5—Cu2—O4 <sup>h</sup>               | 96.6(2)  |
| O1 <sup>f</sup> —Cu1—Cu1 <sup>g</sup> | 135.88(16) | O7—Cu2—O4 <sup>h</sup>               | 93.0(2)  |
| O7—Cu1—Cu1 <sup>g</sup>               | 40.17(15)  | N1—Cu2—O4 <sup>h</sup>               | 102.8(2) |
| O3 <sup>h</sup> —Cu1—Cu1 <sup>g</sup> | 97.22(13)  |                                      |          |

Symmetry codes: a = x, -y+1/2, z-1/2, b = x, -y+3/2, z+1/2, c = 1-x, y-1/2, -z+3/2,  
D = 2-x, y-1/2, -z+3/2, e = x-1, y, z, f = -x, y+5/2, -z+3/2, g = -x, y+3/2, -z+5/2,  
h = 1-x, y+3/2, -z+3/2, i = x, y-1, z+1

**Table S2 Hydrogen bonds in the crystal structures**

**Complex 1**

| D—H...A                     | D...A    | ∠D—H...A |
|-----------------------------|----------|----------|
| O13—H13C...O10              | 2.833(6) | 125.9    |
| O11—H11B...O2 <sup>a</sup>  | 2.743(6) | 133.0    |
| O11—H11C...O7 <sup>b</sup>  | 2.717(6) | 148.1    |
| O10—H10A...O5 <sup>a</sup>  | 3.129(6) | 116.9    |
| O10—H10C...O7 <sup>a</sup>  | 2.848(6) | 128.9    |
| O8—H8C...O13 <sup>e</sup>   | 2.772(6) | 135.6    |
| O8—H8E...O4 <sup>c</sup>    | 2.786(6) | 151.0    |
| O12—H12A...O3 <sup>g</sup>  | 2.763(6) | 152.5    |
| O12—H12B...O13 <sup>f</sup> | 3.127(7) | 160.5    |
| O14—H14A...O6 <sup>d</sup>  | 3.060(6) | 133.2    |
| O14—H14C...O1 <sup>h</sup>  | 2.862(6) | 156.4    |
| O9—H9B...O6 <sup>b</sup>    | 2.649(6) | 129.8    |
| O9—H9B...O14 <sup>i</sup>   | 3.335(6) | 147.2    |
| O9—H9C...O6 <sup>c</sup>    | 2.826(6) | 127.5    |

Symmetry codes: a = -x, y+1/2, 3/2-z, b = x+1, y+1, z, c = -x, -y, 2-z, d = x+1, 1/2-y,  
z-1/2, e = 1-x, y-1/2, 3/2-z, f = x-1, y, z, g = -x, 1-y, 2-z, h = x, 3/2-y, z-1/2, i = x,  
3/2-y, z+1/2.

**Complex 2**

| D—H...A                    | D...A    | ∠D—H...A |
|----------------------------|----------|----------|
| O2—H2B...O3 <sup>f</sup>   | 2.921(8) | 114.7    |
| O2—H2B...O11 <sup>g</sup>  | 3.393(7) | 157.2    |
| O2—H2C...O1a               | 3.226(6) | 134.8    |
| O14—H14A...O2 <sup>j</sup> | 2.786(6) | 136.9    |
| O14—H14C...O6 <sup>h</sup> | 2.792(5) | 151.0    |

|                          |          |       |
|--------------------------|----------|-------|
| O11–H11B…O9 <sup>b</sup> | 2.745(5) | 132.3 |
| O11–H11C…O3 <sup>e</sup> | 2.721(6) | 147.1 |
| O13–H13B…O4 <sup>c</sup> | 2.650(6) | 130.0 |
| O13–H13B…O1 <sup>c</sup> | 3.343(5) | 146.9 |
| O13–H13C…O4 <sup>h</sup> | 2.821(5) | 127.6 |
| O12–H12B…O2 <sup>g</sup> | 2.792(7) | 111.0 |
| O12–H12C…O3 <sup>b</sup> | 2.851(5) | 130.3 |
| O10–H10A…O7 <sup>i</sup> | 2.752(5) | 152.7 |
| O1–H1D…O8 <sup>b</sup>   | 2.874(6) | 170.7 |
| O1–H1C…O4 <sup>d</sup>   | 3.068(5) | 152.4 |

Symmetry codes: a=1-x, y-1/2, -z+1/2, b=1-x, y+1/2, -z+3/2, c=1-x, y-1/2, -z+3/2, d=-x, y+3/2, -z+3/2, e= x+1, y+1, z, f=1-x, -y, 1-z, g=2-x, 1-y, 1-z, h=1-x, -y, 2-z, i=1-x, 1-y, 2-z, j= x, -y+1/2, z+1/2.

### Complex 3

| D–H…A                     | D…A      | □D–H…A |
|---------------------------|----------|--------|
| O13–H13B…O12 <sup>a</sup> | 2.792(5) | 119.6  |
| O13–H13A…O14 <sup>b</sup> | 3.231(6) | 160.2  |
| O14–H14C…O1 <sup>c</sup>  | 2.853(5) | 153.6  |
| O14–H14A…O4 <sup>d</sup>  | 3.056(5) | 156.4  |
| O9–H9C…O13 <sup>e</sup>   | 3.174(5) | 141.6  |
| O9–H9C…O14 <sup>f</sup>   | 2.733(5) | 118.8  |
| O9–H9B…O7 <sup>g</sup>    | 2.764(5) | 153.3  |
| O12–H12C…O5 <sup>e</sup>  | 3.122(5) | 128.2  |
| O12–H12B…O3 <sup>e</sup>  | 2.859(5) | 130.4  |
| O11–H11C…O13 <sup>h</sup> | 2.780(5) | 149.2  |
| O11–H11B…O6 <sup>i</sup>  | 2.807(4) | 160.0  |
| O10–H10C…O3 <sup>j</sup>  | 3.294(5) | 170.6  |
| O10–H10C…O4 <sup>j</sup>  | 2.670(5) | 130.4  |
| O10–H10A…O14 <sup>k</sup> | 3.356(5) | 145.7  |
| O10–H10A…O4 <sup>i</sup>  | 2.819(4) | 118.4  |
| O8–H8E…O7 <sup>g</sup>    | 3.387(5) | 146.5  |
| O8–H8E…O2 <sup>e</sup>    | 2.755(4) | 131.7  |
| O8–H8C…O3 <sup>j</sup>    | 2.723(4) | 148.6  |

Symmetry codes: a = 1-x, 2-y, 1-z, b = x, y+1, z, c = x, -y+1/2, z-1/2, d = 1+x, -y+3/2, z-1/2, e = -x, 2-y, 1-z, f = -x, 1-y, 1-z, g = -x, y+1/2, -z+3/2, h = x, -y+3/2, z+1/2, i = -x, y-1/2, -z+3/2, j = x-1, -y+5/2, z+1/2, k = x, y+1, z+1.

### Complex 4

| D–H…A                     | D…A      | □D–H…A  |
|---------------------------|----------|---------|
| O15–H15B…O13 <sup>a</sup> | 2.860(5) | 139.2bb |
| O15–H15C…O22 <sup>g</sup> | 3.036(7) | 148.1   |
| O16–H16C…O21              | 3.280(7) | 141.2   |
| O16–H16B…O23 <sup>e</sup> | 3.250(7) | 166.3   |

|                           |          |       |
|---------------------------|----------|-------|
| O17–H17C…O19 <sup>c</sup> | 3.296(5) | 149.3 |
| O18–H18A…O24 <sup>d</sup> | 2.781(5) | 146.8 |
| O18–H18C…O13 <sup>f</sup> | 2.817(5) | 144.7 |
| O19–H19A…O2 <sup>c</sup>  | 2.836(5) | 113.2 |
| O19–H19C…O16 <sup>c</sup> | 3.334(5) | 173.7 |
| O20–H20C…O24              | 3.017(5) | 148.4 |
| O21–H21A…O9 <sup>c</sup>  | 2.882(6) | 147.1 |
| O21–H21D…O19              | 2.738(6) | 167.8 |
| O22–H22B…O21              | 2.926(9) | 145.4 |
| O22–H22C…O6 <sup>b</sup>  | 2.951(7) | 131.5 |

Symmetry codes: a = 1-x, y-1/2, 3/2-z, b = 2-x, y-1/2, 3/2-z, c = 1-x, 1-y, 1-z, d = 2-x, 1-y, 2-z, e = x, 1/2-y, z+1/2, f = 1+x, 3/2-y, z+1/2, g = 1-x, y+1/2, 3/2-z.
